# Supplementary material for: High Throughput Sequencing of Extracellular RNA from Human Plasma
Source: PLoS One. 2017 Jan 6;12(1):e0164644. doi: 10.1371/journal.pone.0164644 (PMC5218574; doi:10.1371/journal.pone.0164644)
Supplement: S1 Table — Plasma was treated with a) no proteinase K(No_PK); b) PK treatment before GITC (PK_pre_GITC); c) PK treatment in GITC (PK_in_GITC); d) Repeated PK treatment in GITC (PK_in_GITC_2) (XLSX) [file pone.0164644.s001.xlsx]

## Sheet: TABLE S1
	Table S1. Raw microRNA read counts for plasma sample derived from health subject. Plasma was treated with a) no proteinase K(No_PK); b) PK treatment before GITC (PK_pre_GITC); c) PK treatment in GITC (PK_in_GITC)
	NAME	no_PK	PK_pre_GITC	PK_in_GITC	PK_in_GITC_2
	hsa-let-7a-3p	3	6	10	0
	hsa-let-7a-5p	498	2072	8362	72
	hsa-let-7b-3p	0	0	1	0
	hsa-let-7b-5p	858	3579	6562	299
	hsa-let-7c-5p	443	1911	5052	105
	hsa-let-7d-3p	8	18	49	36
	hsa-let-7d-5p	26	112	1000	12
	hsa-let-7e-5p	46	66	302	26
	hsa-let-7f-1-3p	0	0	2	0
	hsa-let-7f-5p	350	1828	9422	66
	hsa-let-7g-3p	0	2	0	0
	hsa-let-7g-5p	78	453	2396	21
	hsa-let-7i-3p	0	3	1	0
	hsa-let-7i-5p	138	635	2391	78
	hsa-miR-1	48	131	383	3
	hsa-miR-100-5p	51	48	119	44
	hsa-miR-101-3p	210	390	384	13
	hsa-miR-101-5p	1	0	0	0
	hsa-miR-103a-3p	137	228	645	11
	hsa-miR-106a-3p	0	0	1	0
	hsa-miR-106a-5p	2	6	6	0
	hsa-miR-106b-3p	13	17	76	1
	hsa-miR-106b-5p	91	1322	108	2
	hsa-miR-107	113	218	252	0
	hsa-miR-10a-5p	18	98	234	3
	hsa-miR-10b-5p	15	83	301	3
	hsa-miR-1180-3p	17	8	13	4
	hsa-miR-1185-1-3p	1	9	4	0
	hsa-miR-1185-2-3p	0	9	2	0
	hsa-miR-122-3p	0	0	7	0
	hsa-miR-122-5p	6474	34946	9060	1885
	hsa-miR-1224-5p	4	0	5	0
	hsa-miR-1228-5p	0	6	0	3
	hsa-miR-1233-5p	1	0	0	0
	hsa-miR-1246	5081	6529	27237	1782
	hsa-miR-1255a	0	0	4	0
	hsa-miR-1255b-5p	0	0	1	0
	hsa-miR-125a-3p	0	0	4	0
	hsa-miR-125a-5p	21	4	80	10
	hsa-miR-125b-2-3p	1	3	1	0
	hsa-miR-125b-5p	16	16	46	60
	hsa-miR-126-3p	150	351	1233	1
	hsa-miR-126-5p	7	45	62	2
	hsa-miR-1260a	1	0	7	0
	hsa-miR-1260b	1	0	24	0
	hsa-miR-127-3p	43	33	68	155
	hsa-miR-127-5p	0	2	1	0
	hsa-miR-1273h-3p	0	0	1	0
	hsa-miR-1277-3p	0	0	2	0
	hsa-miR-1277-5p	0	0	6	0
	hsa-miR-1278	0	0	5	0
	hsa-miR-128-3p	116	125	236	37
	hsa-miR-1287-5p	0	0	2	1
	hsa-miR-129-5p	1	0	0	1
	hsa-miR-1290	1	2	2	0
	hsa-miR-1291	2	0	1	5
	hsa-miR-1292-5p	0	0	1	0
	hsa-miR-1294	0	4	0	0
	hsa-miR-1296-5p	0	0	3	0
	hsa-miR-1301-3p	15	0	21	3
	hsa-miR-1303	0	1	0	0
	hsa-miR-1304-3p	0	0	1	0
	hsa-miR-1304-5p	0	0	1	0
	hsa-miR-1306-3p	1	2	3	0
	hsa-miR-1307-3p	291	94	181	52
	hsa-miR-1307-5p	19	31	9	21
	hsa-miR-130a-3p	1	6	7	0
	hsa-miR-130b-3p	5	2	0	0
	hsa-miR-130b-5p	0	4	9	0
	hsa-miR-132-3p	0	0	2	0
	hsa-miR-132-5p	21	5	8	0
	hsa-miR-1323	0	0	1	0
	hsa-miR-133a-3p	0	0	9	0
	hsa-miR-133a-5p	0	0	3	0
	hsa-miR-134-5p	106	66	71	70
	hsa-miR-136-3p	2	1	8	0
	hsa-miR-136-5p	5	0	7	0
	hsa-miR-138-5p	0	1	3	0
	hsa-miR-139-3p	7	0	11	16
	hsa-miR-139-5p	8	13	122	4
	hsa-miR-140-3p	425	99	506	198
	hsa-miR-140-5p	2	0	6	0
	hsa-miR-141-3p	0	0	2	0
	hsa-miR-142-3p	4	14	18	0
	hsa-miR-142-5p	238	801	1024	5
	hsa-miR-143-3p	203	184	608	65
	hsa-miR-143-5p	2	0	0	0
	hsa-miR-144-3p	64	132	350	3
	hsa-miR-144-5p	1	0	18	0
	hsa-miR-145-3p	0	3	7	0
	hsa-miR-145-5p	0	0	16	0
	hsa-miR-1468-5p	0	0	1	0
	hsa-miR-1469	0	0	0	3
	hsa-miR-146a-5p	398	185	847	13
	hsa-miR-146b-3p	1	3	5	0
	hsa-miR-146b-5p	372	190	191	238
	hsa-miR-148a-3p	607	887	858	27
	hsa-miR-148a-5p	0	1	1	0
	hsa-miR-148b-3p	102	84	241	13
	hsa-miR-148b-5p	0	0	1	0
	hsa-miR-149-5p	0	0	1	0
	hsa-miR-150-3p	1	0	4	0
	hsa-miR-150-5p	3	2	122	0
	hsa-miR-151a-3p	441	296	356	288
	hsa-miR-151a-5p	3	6	17	0
	hsa-miR-151b	3	6	14	13
	hsa-miR-152-3p	16	19	60	6
	hsa-miR-154-5p	2	0	0	0
	hsa-miR-155-5p	6	2	31	0
	hsa-miR-15a-5p	1	9	9	0
	hsa-miR-15b-3p	0	2	16	0
	hsa-miR-15b-5p	0	4	41	0
	hsa-miR-16-1-3p	1	0	0	0
	hsa-miR-16-2-3p	100	81	121	15
	hsa-miR-16-5p	8	51	116	0
	hsa-miR-17-5p	4	23	41	0
	hsa-miR-181a-2-3p	33	8	22	17
	hsa-miR-181a-3p	5	0	4	0
	hsa-miR-181a-5p	182	306	510	46
	hsa-miR-181b-5p	13	116	110	10
	hsa-miR-181c-3p	1	1	2	0
	hsa-miR-181c-5p	0	0	2	1
	hsa-miR-181d-5p	4	14	8	0
	hsa-miR-182-5p	7	55	182	0
	hsa-miR-1827	0	4	4	0
	hsa-miR-183-5p	1	29	69	6
	hsa-miR-184	0	0	0	2
	hsa-miR-185-3p	4	26	4	3
	hsa-miR-185-5p	102	304	1121	45
	hsa-miR-186-3p	0	0	0	1
	hsa-miR-186-5p	50	20	77	11
	hsa-miR-187-3p	0	2	0	0
	hsa-miR-18a-3p	0	0	3	1
	hsa-miR-18a-5p	0	0	1	0
	hsa-miR-18b-5p	0	0	1	0
	hsa-miR-1908-5p	10	2	8	1
	hsa-miR-191-3p	3	0	0	0
	hsa-miR-191-5p	167	157	1565	89
	hsa-miR-1915-3p	12	0	0	4
	hsa-miR-192-5p	47	155	256	2
	hsa-miR-193a-3p	0	0	8	0
	hsa-miR-193a-5p	11	4	13	11
	hsa-miR-193b-3p	0	0	1	0
	hsa-miR-193b-5p	22	7	0	8
	hsa-miR-194-3p	0	0	1	0
	hsa-miR-194-5p	2	6	25	0
	hsa-miR-195-3p	2	0	2	0
	hsa-miR-195-5p	0	0	1	0
	hsa-miR-196b-3p	0	4	0	0
	hsa-miR-196b-5p	0	0	4	0
	hsa-miR-197-3p	0	0	28	0
	hsa-miR-1976	0	0	1	0
	hsa-miR-199a-3p=hsa-miR-199b-3p	23	82	379	5
	hsa-miR-199a-5p	9	16	114	5
	hsa-miR-199b-5p	0	3	8	0
	hsa-miR-19a-3p	2	5	8	0
	hsa-miR-19b-3p	9	23	30	2
	hsa-miR-200a-3p	1	0	5	0
	hsa-miR-200b-3p	2	0	2	0
	hsa-miR-200c-3p	3	0	6	0
	hsa-miR-203a	8	53	24	8
	hsa-miR-204-3p	2	2	6	4
	hsa-miR-204-5p	0	0	1	0
	hsa-miR-205-5p	5	0	6	2
	hsa-miR-206	3	7	47	0
	hsa-miR-208a-3p	0	2	1	0
	hsa-miR-208b-3p	3	6	4	0
	hsa-miR-20a-5p	2	144	89	0
	hsa-miR-20b-5p	0	38	5	0
	hsa-miR-21-3p	3	2	4	0
	hsa-miR-21-5p	2084	1450	3798	537
	hsa-miR-210-3p	2	20	2	1
	hsa-miR-2110	3	0	18	5
	hsa-miR-2115-5p	0	0	1	0
	hsa-miR-214-3p	2	1	4	0
	hsa-miR-215-5p	9	42	58	0
	hsa-miR-216a-5p	1	0	0	0
	hsa-miR-218-5p	3	1	1	0
	hsa-miR-219a-1-3p	4	9	2	0
	hsa-miR-219a-2-3p	1	2	1	2
	hsa-miR-22-3p	425	1056	693	437
	hsa-miR-22-5p	0	3	2	0
	hsa-miR-221-3p	150	34	364	46
	hsa-miR-221-5p	0	1	5	0
	hsa-miR-222-3p	56	29	112	6
	hsa-miR-223-3p	0	14	452	0
	hsa-miR-223-5p	7	15	2	1
	hsa-miR-224-5p	1	5	27	0
	hsa-miR-2276-3p	0	0	1	0
	hsa-miR-2355-3p	0	0	1	0
	hsa-miR-23a-3p	30	19	279	3
	hsa-miR-23a-5p	1	0	0	1
	hsa-miR-23b-3p	17	18	140	1
	hsa-miR-23b-5p	0	0	1	0
	hsa-miR-24-1-5p	4	3	2	0
	hsa-miR-24-2-5p	25	34	30	3
	hsa-miR-24-3p	110	310	564	10
	hsa-miR-25-3p	133	72	388	53
	hsa-miR-25-5p	11	8	3	0
	hsa-miR-26a-5p	253	393	4164	2
	hsa-miR-26b-3p	0	0	3	0
	hsa-miR-26b-5p	18	85	630	2
	hsa-miR-27a-3p	67	495	641	0
	hsa-miR-27a-5p	0	1	1	2
	hsa-miR-27b-3p	91	493	799	4
	hsa-miR-28-3p	55	28	57	26
	hsa-miR-28-5p	0	2	5	0
	hsa-miR-296-3p	0	0	1	0
	hsa-miR-29a-3p	87	472	379	16
	hsa-miR-29b-3p	4	11	27	1
	hsa-miR-29c-3p	5	8	23	3
	hsa-miR-29c-5p	0	4	2	2
	hsa-miR-301a-3p	2	0	1	0
	hsa-miR-3064-5p	6	1	1	5
	hsa-miR-3074-3p	0	0	1	0
	hsa-miR-3074-5p	0	2	1	0
	hsa-miR-30a-3p	8	138	42	1
	hsa-miR-30a-5p	36	45	105	27
	hsa-miR-30b-3p	0	0	1	0
	hsa-miR-30b-5p	1	0	10	0
	hsa-miR-30c-2-3p	0	0	1	0
	hsa-miR-30c-5p	5	4	131	10
	hsa-miR-30d-3p	0	3	1	0
	hsa-miR-30d-5p	561	145	1671	636
	hsa-miR-30e-3p	9	142	58	2
	hsa-miR-30e-5p	81	175	249	47
	hsa-miR-31-5p	3	2	0	9
	hsa-miR-3120-3p	1	1	4	0
	hsa-miR-3120-5p	0	0	1	0
	hsa-miR-3124-5p	0	0	1	0
	hsa-miR-3127-5p	0	0	1	1
	hsa-miR-3130-3p	0	2	0	0
	hsa-miR-3138	0	2	3	2
	hsa-miR-3141	3	0	0	0
	hsa-miR-3143	0	0	1	0
	hsa-miR-3144-5p	0	0	1	0
	hsa-miR-3150a-5p	0	1	0	0
	hsa-miR-3154	2	0	0	0
	hsa-miR-3155a	0	0	1	0
	hsa-miR-3155b	0	0	1	0
	hsa-miR-3158-3p	4	2	2	2
	hsa-miR-3168	38	834	33	38
	hsa-miR-3173-3p	0	1	0	0
	hsa-miR-3173-5p	0	0	3	0
	hsa-miR-3177-3p	1	3	3	0
	hsa-miR-3182	1	0	0	0
	hsa-miR-3185	2	4	0	2
	hsa-miR-3191-3p	0	4	2	0
	hsa-miR-3198	0	0	1	1
	hsa-miR-32-3p	0	4	0	0
	hsa-miR-32-5p	1	6	7	0
	hsa-miR-3202	1	0	0	0
	hsa-miR-320a	688	555	2581	635
	hsa-miR-320b	206	379	494	5
	hsa-miR-320c	67	117	129	12
	hsa-miR-320d	20	35	23	5
	hsa-miR-320e	8	9	8	0
	hsa-miR-323a-3p	5	0	7	0
	hsa-miR-323b-3p	5	0	12	5
	hsa-miR-324-3p	0	0	3	1
	hsa-miR-324-5p	1	0	0	0
	hsa-miR-326	0	0	4	8
	hsa-miR-328-3p	9	3	51	18
	hsa-miR-328-5p	2	0	0	0
	hsa-miR-329-3p	0	0	6	0
	hsa-miR-330-3p	23	4	30	14
	hsa-miR-330-5p	7	1	10	2
	hsa-miR-331-3p	0	0	3	0
	hsa-miR-331-5p	0	1	0	0
	hsa-miR-335-3p	0	0	21	0
	hsa-miR-335-5p	1	3	12	0
	hsa-miR-337-3p	0	0	8	0
	hsa-miR-337-5p	0	1	0	0
	hsa-miR-338-5p	0	0	2	0
	hsa-miR-339-3p	2	6	5	0
	hsa-miR-339-5p	1	2	16	0
	hsa-miR-33a-5p	0	11	0	0
	hsa-miR-340-3p	4	20	34	0
	hsa-miR-340-5p	33	40	88	6
	hsa-miR-342-3p	1	1	5	0
	hsa-miR-342-5p	15	28	17	1
	hsa-miR-345-5p	3	3	6	3
	hsa-miR-34b-3p	0	0	1	0
	hsa-miR-34c-5p	0	0	0	8
	hsa-miR-3591-3p	0	1	0	0
	hsa-miR-3605-3p	0	0	2	0
	hsa-miR-3605-5p	0	1	1	0
	hsa-miR-361-3p	98	20	77	5
	hsa-miR-361-5p	0	0	15	3
	hsa-miR-3610	0	0	0	2
	hsa-miR-3613-3p	0	0	1	0
	hsa-miR-3613-5p	0	0	1	0
	hsa-miR-3615	11	25	44	33
	hsa-miR-3617-5p	0	0	2	0
	hsa-miR-362-5p	0	0	1	0
	hsa-miR-3621	0	0	1	4
	hsa-miR-363-3p	6	18	105	9
	hsa-miR-3648	0	1	0	0
	hsa-miR-3653	8	2	3	1
	hsa-miR-3655	0	2	0	0
	hsa-miR-3656	0	0	0	1
	hsa-miR-365a-3p=hsa-miR-365b-3p	0	0	1	0
	hsa-miR-3679-5p	0	0	1	0
	hsa-miR-3688-3p	2	0	0	0
	hsa-miR-369-3p	0	0	4	0
	hsa-miR-369-5p	0	0	4	0
	hsa-miR-3691-5p	0	5	0	2
	hsa-miR-370-3p	188	39	182	144
	hsa-miR-371b-5p	0	0	2	0
	hsa-miR-374a-3p	0	0	2	0
	hsa-miR-374a-5p	2	14	19	0
	hsa-miR-374b-3p	1	0	0	0
	hsa-miR-374b-5p	1	0	17	0
	hsa-miR-374c-3p	1	0	0	0
	hsa-miR-374c-5p	1	0	0	0
	hsa-miR-375	20	32	61	13
	hsa-miR-376a-3p	0	0	1	0
	hsa-miR-376c-3p	1	0	3	1
	hsa-miR-378a-3p	126	55	94	156
	hsa-miR-378c	15	10	6	0
	hsa-miR-378d	15	7	4	0
	hsa-miR-378e	1	0	0	0
	hsa-miR-378f	0	1	0	0
	hsa-miR-378g	2	1	0	0
	hsa-miR-378i	0	0	1	0
	hsa-miR-379-5p	34	54	74	22
	hsa-miR-381-3p	39	15	36	6
	hsa-miR-382-3p	0	0	19	0
	hsa-miR-382-5p	2	4	30	0
	hsa-miR-3911	1	0	0	0
	hsa-miR-3913-5p	1	0	0	0
	hsa-miR-3928-3p	4	0	2	0
	hsa-miR-3940-3p	0	0	2	0
	hsa-miR-409-3p	27	20	14	33
	hsa-miR-409-5p	0	0	1	0
	hsa-miR-410-3p	4	0	1	3
	hsa-miR-411-3p	0	0	11	0
	hsa-miR-411-5p	3	6	10	0
	hsa-miR-412-5p	0	2	0	2
	hsa-miR-421	3	0	5	0
	hsa-miR-423-3p	186	286	355	58
	hsa-miR-423-5p	856	982	1474	1358
	hsa-miR-424-3p	15	7	13	5
	hsa-miR-424-5p	0	1	0	0
	hsa-miR-425-3p	78	28	23	13
	hsa-miR-425-5p	56	117	135	10
	hsa-miR-4284	1	3	0	0
	hsa-miR-4288	5	0	0	0
	hsa-miR-429	0	0	1	0
	hsa-miR-4306	11	259	38	0
	hsa-miR-431-3p	0	1	1	0
	hsa-miR-431-5p	3	0	1	0
	hsa-miR-432-5p	13	17	74	6
	hsa-miR-4324	0	1	2	0
	hsa-miR-433-3p	6	0	9	9
	hsa-miR-433-5p	0	0	1	0
	hsa-miR-4419a	2	0	0	3
	hsa-miR-4429	0	0	1	0
	hsa-miR-4433b-3p	473	101	124	187
	hsa-miR-4433b-5p	0	0	21	1
	hsa-miR-4443	85	165	1	369
	hsa-miR-4446-3p	2	5	13	4
	hsa-miR-4449	1	0	1	0
	hsa-miR-4459	1	0	0	0
	hsa-miR-4461	4	0	0	3
	hsa-miR-4463	2	0	0	3
	hsa-miR-4466	1	0	0	0
	hsa-miR-4468	0	0	1	0
	hsa-miR-4473	0	0	12	0
	hsa-miR-4485	16	0	2	185
	hsa-miR-4504	0	0	1	0
	hsa-miR-450a-5p	10	4	7	0
	hsa-miR-450b-5p	0	3	1	0
	hsa-miR-4510	0	0	3	0
	hsa-miR-4516	1	0	2	3
	hsa-miR-451a	525	3731	6672	10
	hsa-miR-451b	0	0	1	0
	hsa-miR-452-5p	1	0	2	0
	hsa-miR-4528	0	0	1	0
	hsa-miR-454-3p	0	0	1	0
	hsa-miR-454-5p	0	0	3	0
	hsa-miR-455-3p	0	5	0	0
	hsa-miR-455-5p	3	13	1	0
	hsa-miR-4638-5p	1	0	0	0
	hsa-miR-4644	0	0	0	1
	hsa-miR-4645-3p	0	0	2	0
	hsa-miR-4646-5p	3	0	1	0
	hsa-miR-4647	0	0	1	0
	hsa-miR-4659a-3p	3	2	1	0
	hsa-miR-4659b-3p	3	2	3	0
	hsa-miR-4664-3p	3	3	1	0
	hsa-miR-4667-5p	0	0	2	0
	hsa-miR-4669	0	0	2	0
	hsa-miR-4671-5p	3	4	2	0
	hsa-miR-4674	0	4	0	0
	hsa-miR-4677-3p	0	4	0	0
	hsa-miR-4686	0	0	1	0
	hsa-miR-4687-3p	0	0	2	0
	hsa-miR-4690-3p	1	0	0	0
	hsa-miR-4698	0	0	1	1
	hsa-miR-4700-5p	1	1	0	0
	hsa-miR-4701-3p	2	0	0	0
	hsa-miR-4710	0	0	1	0
	hsa-miR-4732-3p	1	0	2	0
	hsa-miR-4732-5p	0	4	9	0
	hsa-miR-4738-3p	1	0	0	0
	hsa-miR-4739	0	1	0	2
	hsa-miR-4741	0	1	0	0
	hsa-miR-4742-3p	1	0	0	0
	hsa-miR-4745-3p	1	0	0	0
	hsa-miR-4746-5p	2	0	0	0
	hsa-miR-4747-5p	0	0	0	1
	hsa-miR-4750-5p	3	0	0	0
	hsa-miR-4753-5p	1	0	0	0
	hsa-miR-4758-5p	40	0	22	28
	hsa-miR-4767	0	0	0	2
	hsa-miR-4772-5p	2	1	0	0
	hsa-miR-483-5p	1	14	1	31
	hsa-miR-484	1	4	95	0
	hsa-miR-485-3p	1	0	1	13
	hsa-miR-485-5p	8	5	0	13
	hsa-miR-486-3p	4	5	41	2
	hsa-miR-486-5p	50	982	894	150
	hsa-miR-487b-3p	0	0	5	0
	hsa-miR-490-3p	0	5	0	0
	hsa-miR-493-3p	20	15	25	0
	hsa-miR-493-5p	2	17	37	0
	hsa-miR-494-3p	0	0	19	0
	hsa-miR-495-3p	8	0	34	0
	hsa-miR-499a-5p	2	0	2	0
	hsa-miR-5000-5p	1	0	0	0
	hsa-miR-500a-3p	0	0	6	0
	hsa-miR-501-3p	2	1	6	0
	hsa-miR-501-5p	0	0	1	0
	hsa-miR-502-3p	0	0	4	0
	hsa-miR-503-5p	2	21	9	0
	hsa-miR-504-3p	0	2	0	1
	hsa-miR-504-5p	0	0	2	0
	hsa-miR-505-3p	0	0	6	0
	hsa-miR-505-5p	2	0	4	0
	hsa-miR-509-3-5p	100	176	104	0
	hsa-miR-5100	0	0	0	1
	hsa-miR-511-3p	0	5	17	0
	hsa-miR-511-5p	8	2	15	0
	hsa-miR-513c-5p	1	0	0	0
	hsa-miR-516b-5p	1	0	1	0
	hsa-miR-5187-5p	0	0	1	3
	hsa-miR-5192	2	0	0	0
	hsa-miR-532-3p	0	0	4	0
	hsa-miR-532-5p	46	17	46	20
	hsa-miR-542-3p	0	1	0	0
	hsa-miR-543	45	19	73	17
	hsa-miR-548ap-5p	9	0	0	0
	hsa-miR-548av-5p	0	0	2	0
	hsa-miR-548e-3p	0	2	3	0
	hsa-miR-548f-3p	0	1	0	0
	hsa-miR-548g-3p	0	1	0	0
	hsa-miR-548j-3p	0	0	1	0
	hsa-miR-548j-5p	9	0	0	2
	hsa-miR-548k	0	0	2	0
	hsa-miR-548o-3p	0	5	1	0
	hsa-miR-548q	0	2	0	0
	hsa-miR-550a-3-5p	0	0	4	0
	hsa-miR-550a-3p	0	0	1	0
	hsa-miR-550a-5p	0	0	5	0
	hsa-miR-5584-5p	0	0	1	0
	hsa-miR-5586-5p	0	0	2	0
	hsa-miR-5587-3p	0	1	0	0
	hsa-miR-561-5p	0	1	0	0
	hsa-miR-5695	0	0	1	0
	hsa-miR-574-3p	0	0	57	0
	hsa-miR-576-3p	2	1	3	9
	hsa-miR-576-5p	0	0	2	0
	hsa-miR-5787	10	0	1	0
	hsa-miR-580-3p	4	0	0	0
	hsa-miR-582-3p	10	11	9	0
	hsa-miR-584-5p	69	67	76	31
	hsa-miR-589-3p	0	3	0	0
	hsa-miR-598-3p	0	1	1	0
	hsa-miR-6088	0	6	0	0
	hsa-miR-6089	0	0	0	4
	hsa-miR-6090	21	15	0	1
	hsa-miR-610	20	0	0	1
	hsa-miR-6124	3	0	0	0
	hsa-miR-6125	1	0	0	0
	hsa-miR-6129	0	0	1	0
	hsa-miR-6130	0	0	7	0
	hsa-miR-6131	1	1	0	3
	hsa-miR-615-3p	0	0	3	0
	hsa-miR-618	0	0	1	0
	hsa-miR-625-3p	0	0	11	0
	hsa-miR-625-5p	2	0	0	0
	hsa-miR-628-3p	2	7	10	2
	hsa-miR-628-5p	0	0	1	0
	hsa-miR-629-5p	9	21	27	7
	hsa-miR-632	0	0	0	2
	hsa-miR-636	0	3	1	0
	hsa-miR-641	1	9	2	0
	hsa-miR-642a-3p	1	0	1	0
	hsa-miR-6501-5p	0	0	1	0
	hsa-miR-6503-3p	5	2	5	0
	hsa-miR-6503-5p	1	21	4	0
	hsa-miR-6507-5p	0	4	0	0
	hsa-miR-651-5p	0	2	2	0
	hsa-miR-6510-3p	0	1	0	0
	hsa-miR-6511b-3p	0	0	1	0
	hsa-miR-6513-3p	0	1	1	0
	hsa-miR-6515-3p	0	0	1	0
	hsa-miR-652-3p	4	6	23	0
	hsa-miR-653-3p	0	0	1	0
	hsa-miR-654-3p	5	15	15	0
	hsa-miR-654-5p	5	7	13	7
	hsa-miR-658	143	433	37	4
	hsa-miR-660-3p	1	0	0	0
	hsa-miR-660-5p	4	0	6	2
	hsa-miR-664a-3p	0	0	11	0
	hsa-miR-664a-5p	2	4	33	0
	hsa-miR-664b-5p	2	0	1	1
	hsa-miR-668-3p	2	0	1	0
	hsa-miR-671-3p	0	2	8	0
	hsa-miR-671-5p	4	0	0	0
	hsa-miR-6715a-3p	4	0	0	0
	hsa-miR-6717-5p	0	0	0	2
	hsa-miR-6718-5p	1	0	0	0
	hsa-miR-6726-3p	0	0	0	3
	hsa-miR-6734-5p	0	5	0	10
	hsa-miR-6738-5p	0	1	0	0
	hsa-miR-6741-5p	3	0	2	0
	hsa-miR-6743-5p	0	3	0	0
	hsa-miR-675-5p	0	2	0	0
	hsa-miR-6763-5p	0	2	1	0
	hsa-miR-6765-5p	0	0	0	2
	hsa-miR-6767-5p	0	0	2	0
	hsa-miR-6772-3p	2	0	1	0
	hsa-miR-6778-5p	0	5	0	0
	hsa-miR-6779-5p	0	2	0	0
	hsa-miR-6787-5p	0	5	0	0
	hsa-miR-6799-5p	0	3	0	0
	hsa-miR-6801-5p	0	0	1	0
	hsa-miR-6803-3p	0	0	1	0
	hsa-miR-6805-5p	0	2	0	0
	hsa-miR-6806-3p	0	0	1	0
	hsa-miR-6815-5p	0	3	0	5
	hsa-miR-6821-5p	4	0	0	0
	hsa-miR-6824-5p	0	0	0	1
	hsa-miR-6833-3p	0	0	1	0
	hsa-miR-6842-3p	4	1	4	3
	hsa-miR-6842-5p	0	0	1	0
	hsa-miR-6843-3p	0	0	3	4
	hsa-miR-6847-5p	0	0	1	0
	hsa-miR-6852-3p	0	1	4	2
	hsa-miR-6852-5p	4	0	8	2
	hsa-miR-6854-5p	0	0	0	1
	hsa-miR-6855-3p	1	3	0	0
	hsa-miR-6856-5p	0	0	1	0
	hsa-miR-6858-5p	0	0	0	1
	hsa-miR-6859-5p	0	2	0	0
	hsa-miR-6863	2	0	0	0
	hsa-miR-6868-3p	0	0	1	2
	hsa-miR-6869-5p	1	0	1	0
	hsa-miR-6884-5p	2	0	0	0
	hsa-miR-6891-5p	1	5	0	5
	hsa-miR-6892-5p	4	0	1	0
	hsa-miR-6894-5p	0	0	1	0
	hsa-miR-7-1-3p	0	0	1	0
	hsa-miR-7-5p	8	71	90	4
	hsa-miR-708-3p	7	7	7	0
	hsa-miR-7110-3p	0	0	1	2
	hsa-miR-7110-5p	0	0	0	2
	hsa-miR-7111-5p	0	1	0	0
	hsa-miR-7113-5p	1	0	0	0
	hsa-miR-7155-3p	0	1	0	0
	hsa-miR-718	1	2	0	2
	hsa-miR-744-5p	111	82	213	44
	hsa-miR-760	4	0	7	0
	hsa-miR-7641	0	3	0	2
	hsa-miR-766-3p	0	0	7	0
	hsa-miR-766-5p	2	1	4	2
	hsa-miR-769-5p	1	0	6	0
	hsa-miR-7704	1	0	0	0
	hsa-miR-7705	0	3	0	0
	hsa-miR-7706	5	2	9	3
	hsa-miR-7844-5p	0	1	1	0
	hsa-miR-7845-5p	0	0	0	1
	hsa-miR-7848-3p	0	4	0	0
	hsa-miR-7854-3p	0	0	1	0
	hsa-miR-7976	0	1	4	0
	hsa-miR-7977	0	0	3	0
	hsa-miR-8069	12	6	0	7
	hsa-miR-8072	0	0	0	2
	hsa-miR-873-5p	3	0	2	2
	hsa-miR-874-3p	1	0	0	0
	hsa-miR-877-3p	0	0	3	0
	hsa-miR-877-5p	2	1	4	0
	hsa-miR-887-3p	0	0	1	0
	hsa-miR-889-3p	5	3	6	0
	hsa-miR-9-5p	0	16	0	0
	hsa-miR-92a-3p	381	390	1465	723
	hsa-miR-92b-3p	0	3	16	7
	hsa-miR-92b-5p	14	15	0	19
	hsa-miR-93-3p	0	0	3	0
	hsa-miR-93-5p	54	150	93	11
	hsa-miR-939-5p	3	0	0	6
	hsa-miR-941	202	94	19	29
	hsa-miR-942-5p	0	5	2	0
	hsa-miR-943	0	2	0	0
	hsa-miR-944	0	1	0	0
	hsa-miR-95-3p	0	0	2	0
	hsa-miR-96-5p	0	6	5	0
	hsa-miR-98-3p	0	0	1	0
	hsa-miR-98-5p	0	18	97	6
	hsa-miR-99a-5p	178	169	372	38
	hsa-miR-99b-3p	1	0	2	1
	hsa-miR-99b-5p	37	26	122	51
